# Supplementary material for: CARD9 Promotes Sex-Biased Colon Tumors in the APCmin Mouse Model
Source: Oxford University Press journal article supplement (doi:10.1158/2326-6066.cir-14-0148), 2015-05-04
Supplement: 23266066cir140148-sup-136172_2_supp_data_2913527_nlr6v8.docx [file 23266066cir140148-sup-136172_2_supp_data_2913527_nlr6v8.docx]

**Suppl Figure S1. Small intestinal tumorigenesis profiles.** Small intestines from cocaged, sex- and age-matched CARD9-competent (+/+) and -deficient (-/-) were assessed for (A) tumor multiplicity, (B) total tumor burden, and (C) average tumor size. Results from paired samples are connected by lines. No statistically significant differences were observed.

**Suppl Figure S2. Most plasma cytokine & chemokine levels are not effected by CARD9.** (A) Plasma levels of indicated cytokines and chemokines were examined for male and female CARD9-competent (+/+) and -deficient (-/-) APCmin mice at endpoint. Anderson-Darling normality testing was performed to suggest plots of linear or log-transformed data. Ligands that did not demonstrate normal distribution, for either raw or log-transformed data, were excluded. Results from paired samples are connected by a line. No statistically significant differences were observed by Wilcoxon signed-rank test (B) Indicated plasma cytokine concentrations from male CARD9-competent (▲) and -deficient mice () were plotted against small intestinal tumor burden.

| Tumor Size | CARD9  Genotype | CD3+  cells/mm2 | F4/80+ cells/mm2 | Ly-6G+ cells/mm2 | Ki67+ cells/mm2 |
| --- | --- | --- | --- | --- | --- |
| 4 mm | +/+ | 156.25 | 187.5 | 431.25 | 2400 |
| -/- | 150 | 137.5 | 493.75 | 2850 |
| 3.2 mm | +/+ | 187.5 | 68.75 | 118.75 | 3525 |
| -/- | 250 | 181.25 | 312.5 | 2925 |

**Supplementary Table S1.** Immune infiltration data from size- and location-matched colonic APCmin adenomas of paired female mice.
